# Supplementary material
Source: PubMed Central journal article supplement (PMC6806442)
Supplement: jama-322-1570-s002.pdf [file jama-322-1570-s002.pdf]

Greene SA, De Vuyst H, John-Stewart GC, et al. Effect of cryotherapy vs loop electrosurgical excision procedure on cervical disease recurrence among women with HIV and high-grade cervical lesions in Kenya: a randomized clinical trial [published October 22, 2019]. *JAMA*. doi:10.1001/jama.2019.14969

## Data Sharing Statement

### Data

**Data available:** Yes

**Data types:** Deidentified participant data, Data dictionary

**How to access data:** The data will be made available upon request to Dr. Michael H. Chung at [mhchung@uw.edu](mailto:mhchung@uw.edu)

**When available:** With publication

### Supporting Documents

**Document types:** None

### Additional Information

**Who can access the data:** Researchers whose proposed use of the data has been approved by the Principal Investigator.

**Types of analyses:** For a specified reason, with a proposal and a statistical analysis plan

**Mechanisms of data availability:** With investigator support, approval of a proposal, and a signed data access agreement
